# Supplementary material for: Improving Yield and Nitrogen use Efficiency in Wheat by Overexpressing TaNAC2-5A Transcription Factor
Source: Research Square preprint supplement (doi:10.21203/rs.3.rs-6421854/v1), 2025-05-14
Supplement: Supplementary file 1 [file ec9f865d9f364003736f7144.docx]

**Supplementary Figures**


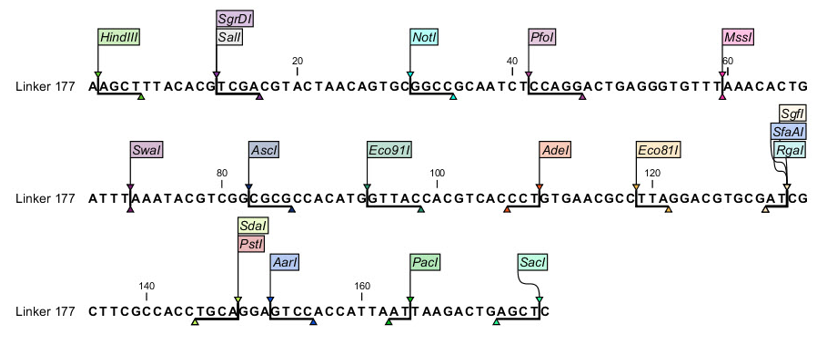
 **Fig. S1** Rare cutter 177 bp linker sequence added to develop MCS in pSB219 vector (CLC Bio Main Workbench, Qiagen). This sequence was added by replacing the GFP cassette originally present in pSB219 vector to develop the modified-pSB219 (pSB219M) having rare cutter sites that can be used for cloning


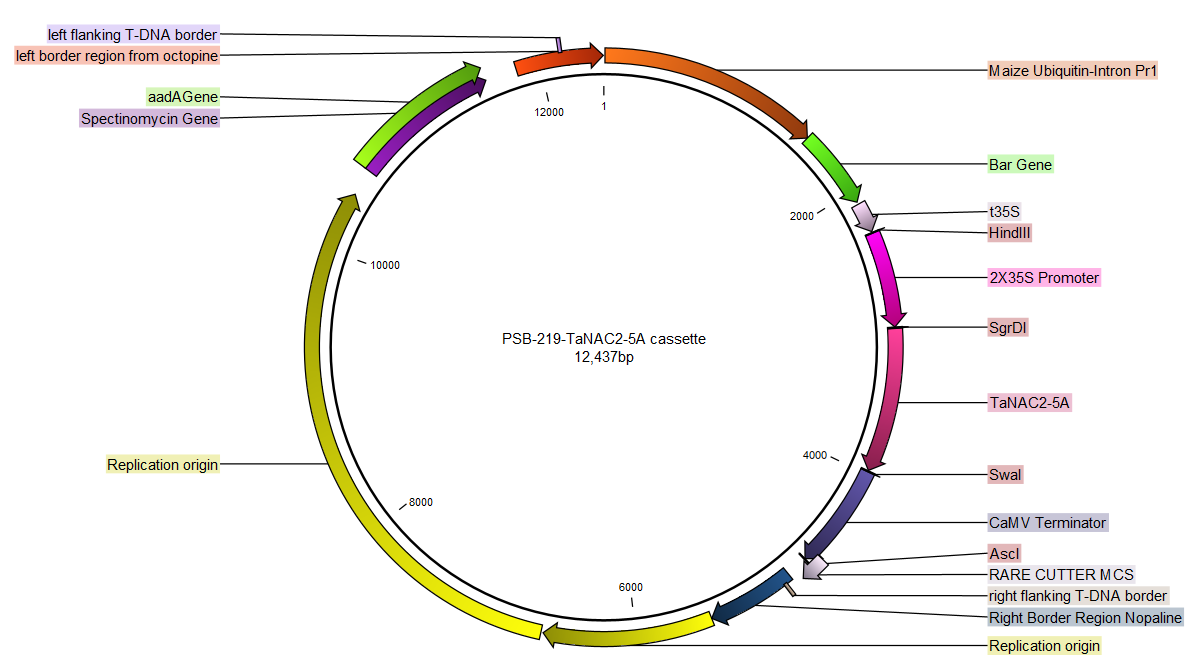


**Fig. S2a** Circular map of *TaNAC2-5A* harbouring construct named as pSB219-NAC2


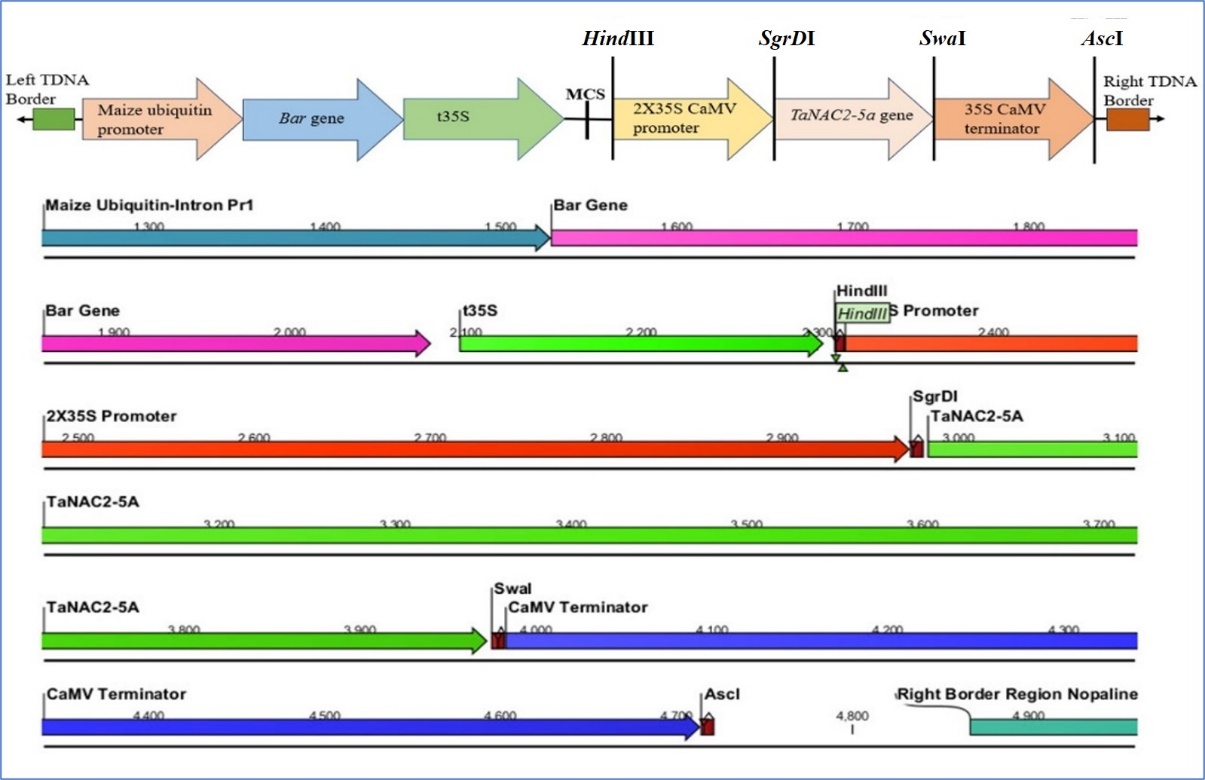


**Fig. S2b** Schematic representation of pSB219-NAC2 expression cassette. The *TaNAC2-5A*gene was cloned between *Sgr*D1 and *Swa*1 sites in pSB219M-PT. Cassette designing in the transformation vector was done on CLC Main Workbench Ver. 6.7.1


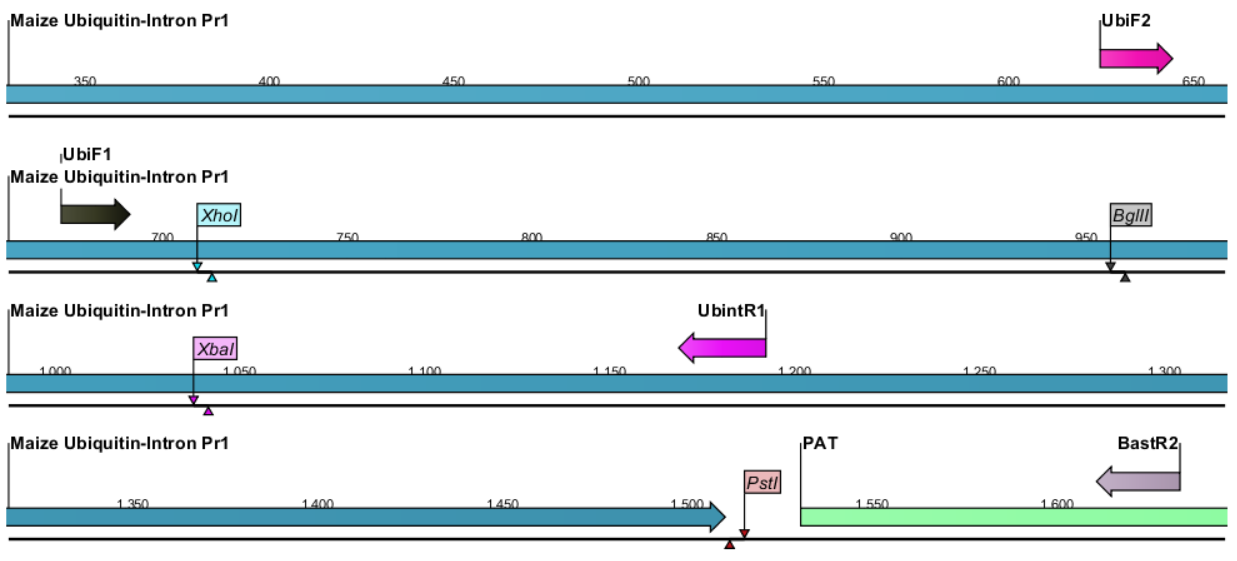


**Fig. S3** Map showing the location of primers on the maize ubiquitin promoter and *bar* gene in vector pSB219M-PT for transgene detection


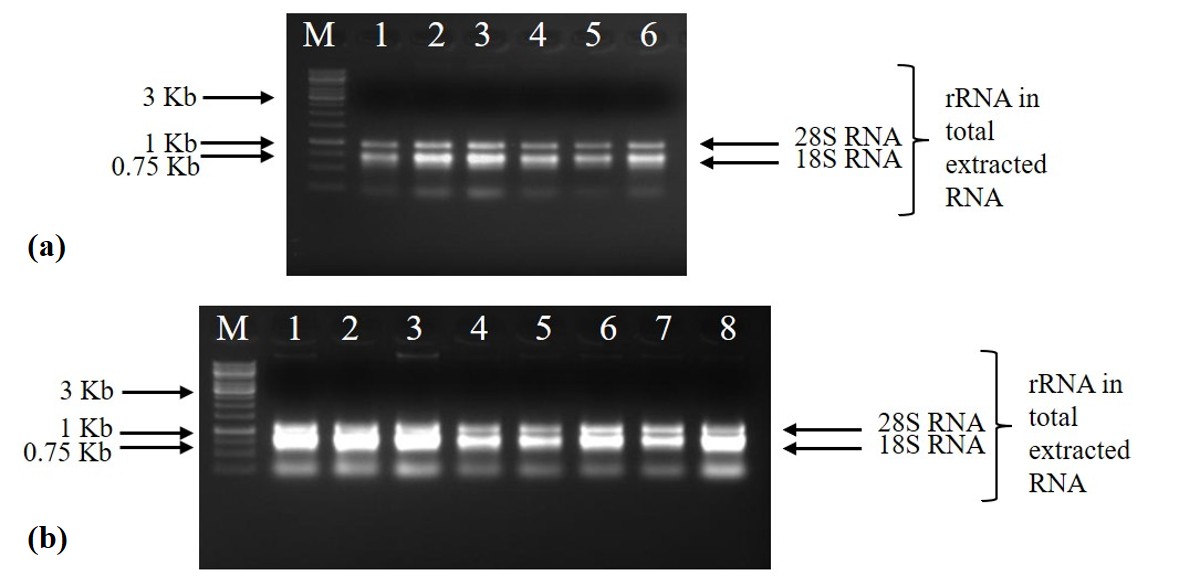


**Fig. S4** Total RNA isolation of non- transgenic wheat controls and selected *TaNAC2-5A* T2 wheat lines. (**a**) Lane M: 1 Kb DNA Ladder, Lane 1-6 specifies total RNA of FSD-2008 and Galaxy control plants. (**b**) Lane M: 1 Kb DNA Ladder, Lane 1-3 specifies total RNA of selected plants from NAC2-1, Lane 4-6 specifies the total RNA of selected plants from NAC2-2, Lane 7-8 indicates the total RNA of selected plants from NAC2-4. The upper band indicates 28SrRNA RNA and lower band indicates 18SrRNA


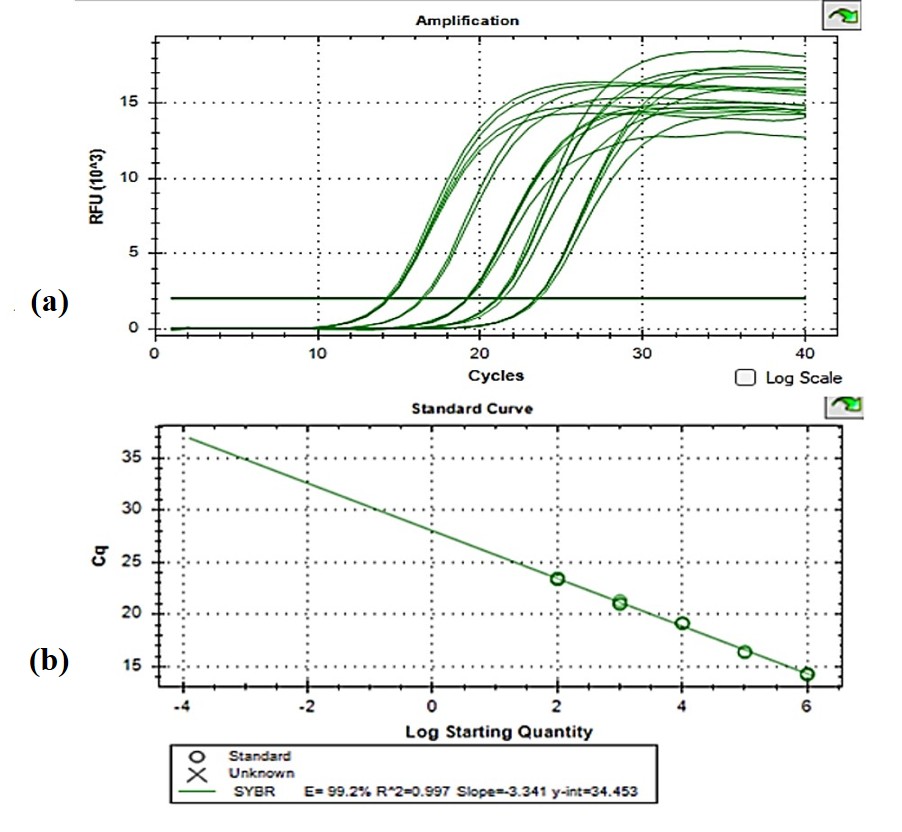


**Fig.** **S5** Standard curve optimization using pre-amplified pooled cDNA for *TaNAC2-5A* gene. (**a**) Amplifications of different standards in 4 replicates at different Ct values are shown. (**b**) Standard curve showing 99.2 % efficiency of the PCR,0.997 R2 value and -3.341 Slope value


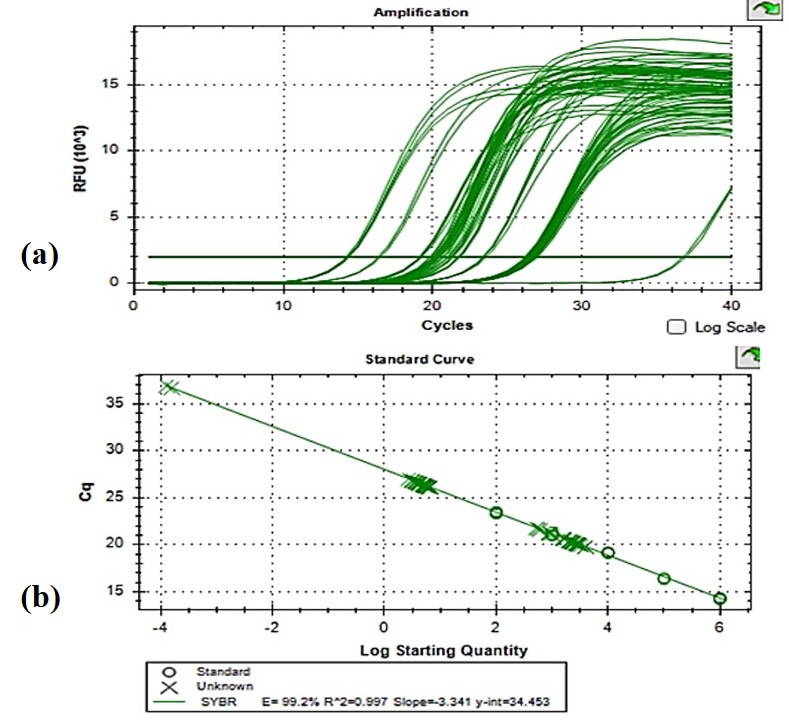


**Fig.** **S6** Quantitative real time expression analysis of *TaNAC2-5A* gene in wheat parent line FSD-2008. (**a**) Amplification peaks showing cyclic thresholds (Ct) for different expression levels of *TaNAC2-5A* gene in each independent transgenic line. (**b**) Quantification cycles (Cq) of the unknown samples for *TaNAC2-5A* and internal control *Alpha-Tubulin* are shown on standard curve. PCR efficiency of 99.2 % and R2 value of 0.997 is shown


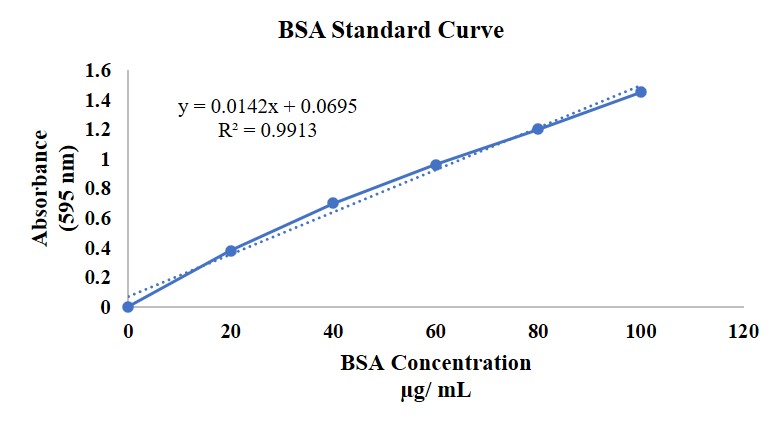


**Fig. S7** BSA standard curve for the estimation of total protein content of the *TaNAC2-5A* transgenics and wild-type controls

**Supplementary Tables**

Table S1a Composition of digestion reaction for cloning *TaNAC2-5A* gene in pSB219M-PT

| **Components** | **Volume (µL)** |
| --- | --- |
| Plasmid (pUC57-NAC2) | 3 |
| Plasmid (pSB219M-PT) | 3 |
| Tango Buffer (10X) | 4 |
| *SgrD*I (10 Units/µL) | 0.5 |
| *Swa*I (10 Units/µL) | 0.5 |
| Nuclease free water | 9 |
| Total volume | 20 |

Table S1b Composition of ligation reaction for ligating *TaNAC2-5A* gene in between *Sgr*D1 and *Swa*I restriction sites in pSB219M-PT vector

| **Components** | **Ligation (µL)** |
| --- | --- |
| *TaNAC2-5A* gene | 5 |
| pSB219M-PT vector | 5 |
| *T4* DNA Ligase Buffer (10X) | 2 |
| *T4* DNA Ligase | 1 |
| Nuclease free water | 7 |
| Total | 20 |

Table S2a Composition of the PCR mix for the verification of pSB219-NAC2 cassette

| **Components of PCR Mix** | **Volume (μL)** |
| --- | --- |
| *Taq* DNA Polymerase (5U/ μL) | 0.25 |
| 10X *Taq* Buffer | 2 |
| MgCl2 (25 mM) | 1.2 |
| dNTPs (2.5 mM) | 1 |
| Forward Primer (20 ng/ µL) | 1 |
| Reverse Primer (20 ng/ µL) | 1 |
| Template | 1 |
| Nuclease free water | 12.55 |
| Total Volume | 20 |

Table S2b. PCR profile for the verification of *TaNAC2-5A* gene in pSB219-NAC2 cassette

| **Steps** | **Temperature (oC)** | **Time (min)** | **No. of Cycles** |
| --- | --- | --- | --- |
| Initial Denaturation | 94.0 | 5 | 1 |
| Denaturation | 94.0 | 1 | 40 |
| Annealing | 58.0 | 1 |
| Extension | 72.0 | 1 |
| Final Extension | 72.0 | 10 | 1 |

Table S3. Different primer combinations for the expression studies in *TaNAC2-5A* wheat transgenic lines

| **Sr. No.** | **Primer Combination** | **Amplicon Size  (bp)** |
| --- | --- | --- |
| 1 | NACqRTF1/ NACqRTR1 | 274 |
| 2 | NACqRTF1/ NACqRTR2 | 279 |
| 3 | NACqRTF1/ NACqRTR3 | 279 |
| 4 | NACqRTF2/ NACqRTR1 | 279 |
| 5 | NACqRTF2/ NACqRTR2 | 286 |
| 6 | NACqRTF2/ NACqRTR3 | 286 |
| 7 | NACqRTF3/ NACqRTR1 | 282 |
| 8 | NACqRTF3/ NACqRTR2 | 287 |
| 9 | NACqRTF3/ NACqRTR3 | 287 |
| 10 | AlphaTubF/AlphaTubR2 | 260 |

Table S4 Composition of the qRT-PCR master mix for the expression studies of *TaNAC2-5A* gene in wheat transgenics

| Components of Master Mix | Volume (μL) |
| --- | --- |
| BlasTaq 2X qPCR Master Mix | 10 |
| MgCl2 (25 mM) | 1.2 |
| Forward Primer (20 ng/ µL) | 1 |
| Reverse Primer (20 ng/ µL) | 1 |
| Template (cDNA) | 1 |
| Nuclease free water | 5.8 |
| Total Volume | 20 |

Table S5 PCR profile for expression analysis of *TaNAC2-5A* gene by qRT-PCR

| **Steps** | **Temperature oC** | **Time** | **Number of Cycles** |
| --- | --- | --- | --- |
| Initial Denaturation | 94.0 | 5 min | 1 |
| Denaturation | 94.0 | 1 min | 40 |
| Annealing | 62.0 | 30 sec |
| Extension | 72.0 | 30 sec |
| Final Extension | 72.0 | 10 | 1 |
| Melt Curve | 72.0 oC to 95.0 oC, increment 0.5 oC, for 0:05 + Plate Read | | |

Table S6 Putative *TaNAC2-5A* transgenic lines and their T1 seeds for collection of T2 seeds and leaves for transgene analysis and expression studies

| **Sr. No.** | **Parent Wheat Line** | **T0 Transgenic event** | **No. of T1 seeds obtained from T0 potted plants** | **No. of seeds sown** | **No. of T1 seeds germinated** | **PCR positive T1 plants** |
| --- | --- | --- | --- | --- | --- | --- |
| 1 | Galaxy | NAC2-1 | 7 | 7 | 5 | L2, L3, L4 |
| 2 | Galaxy | NAC2-2 | 3 | 3 | 2 | L1, L2, |
| 3 | Galaxy | NAC2-3 | 2 | 2 | - | - |
| 4 | FSD-2008 | NAC2-4 | 15 | 10 | 8 | L1, L4-L8 |
| 5 | Galaxy | NAC2-5 | 4 | 4 | - | - |
| 6 | FSD-2008 | NAC2-6 | 8 | 8 | 1 | - |
| 7 | FSD-2008 | NAC2-7 | 1 | 1 | - | - |

**Table S7** Rhizo-scanning data of *TaNAC2-5A* T2 transgenic lines grown in hydroponics

| **Transgenic Lines** | **Root Length (cm)** | **Surface Area (cm2)** | **Volume (cm3)** | **Average Diameter (mm)** | **Projected Area (cm2)** |
| --- | --- | --- | --- | --- | --- |
| **Control FSD-2008** | 42 | 1431.6 | 6716.482 | 187.664 | 455.692 |
| **NAC2-4(L6)** | 44 | 1531.771 | 6199.411 | 189.383 | 465.747 |
| **NAC2-4(L7)** | 46 | 1539.877 | 6776.648 | 198.256 | 468.327 |
| **NAC2-4(L5)** | 43 | 1570.412 | 7720.079 | 196.638 | 499.878 |
